# Supplementary material for: Structural, electrical, and dielectric study of the influence of 3.4% lanthanide (Ln3+ = Sm3+ and La3+) insertion in the A-site of perovskite Ba0.95Ln0.034Ti0.99Zr0.01O3
Source: Royal Society of Chemistry journal article supplement (doi:10.1039/d2ra06758g), 2022-01-01
Supplement: d2ra06758g1.pdf [file d2ra06758g1.pdf]

## Electronic Supplementary Material

Table S1. Experimental parameters for X-ray powder diffraction of BZT, BSmZT and BLaZT ceramics

| <b>Chemical formula</b>      | BZT                        | BSmZT                      | BLadZT                     |
|------------------------------|----------------------------|----------------------------|----------------------------|
| Crystal system               | Tetragonal                 | Tetragonal                 | Tetragonal                 |
| Space group                  | P4mm                       | P4mm                       | P4mm                       |
| a (Å) = b (Å)                | 3.9868(5)                  | 3.9779(4)                  | 3.9762(6)                  |
| c (Å)                        | 4.0214(5)                  | 3.9998(4)                  | 4.0068(7)                  |
| $c/a$                        | 1.0087                     | 1.0055                     | 1.0077                     |
| Volume (Å <sup>3</sup> )     | 63.918(14)                 | 63.291(10)                 | 63.348(18)                 |
| Z                            | 1                          | 1                          | 1                          |
| Density (g/cm <sup>3</sup> ) | 6.0701                     | 6.0842                     | 6.0848                     |
| Temperature (°C)             | 25                         | 25                         | 25                         |
| CuK $\alpha$ Radiations (Å)  | 1.54056                    | 1.54056                    | 1.54056                    |
| Measuring range (°)          | $10 \leq 2\theta \leq 110$ | $10 \leq 2\theta \leq 110$ | $10 \leq 2\theta \leq 110$ |
| Step (2 $\theta$ )           | 0.031                      | 0.031                      | 0.031                      |
| <b>Rietveld data</b>         |                            |                            |                            |
| Program                      | Jana 2006                  | Jana 2006                  | Jana 2006                  |
| Profile fonction             | Pseudo-Voigt               | Pseudo-Voigt               | Pseudo-Voigt               |
| Caglioti parameters          | U = 0.597                  | U = 0.496                  | U = 0.438                  |
|                              | V = -0.415                 | V = -0.492                 | V = -0.381                 |
|                              | W = 0.179                  | W = 0.201                  | W = 0.135                  |
| Rp (%)                       | 9.19                       | 6.34                       | 7.64                       |
| Rwp (%)                      | 12.72                      | 8.23                       | 10.19                      |
| Rexp (%)                     | 7.29                       | 6.45                       | 6.65                       |
| GOF                          | 1.74                       | 1.28                       | 1.53                       |

Table S2. Refined structural parameters for BZT, BSmZT and BLaZT powder from X-ray diffraction data.

| Compound | Wyckoff position | Atom  | x   | y   | z           | Uiso (Å <sup>2</sup> ) | Occupies   |
|----------|------------------|-------|-----|-----|-------------|------------------------|------------|
| BZT      | 1a               | Ba    | 0.5 | 0.5 | 0.5074(13)  | 0.027(2)               | 1          |
|          | 1b               | Ti/Zr | 0   | 0   | -0.0127(19) | 0.031(2)               | 0.99/0.01  |
|          | 1c               | O1    | 0.5 | 0   | 0.028(5)    | 0.027(3)               | 1          |
|          | 1d               | O2    | 0   | 0   | 0.534(7)    | 0.027(3)               | 1          |
| BSmZT    | 1a               | Ba/Sm | 0.5 | 0.5 | 0.5216      | 0.0253(13)             | 0.95/0.034 |
|          | 1b               | Ti/Zr | 0   | 0   | 0.001(4)    | 0.0262(15)             | 0.99/0.01  |
|          | 1c               | O1    | 0.5 | 0   | 0.104(5)    | 0.0204                 | 1          |
|          | 1d               | O2    | 0   | 0   | 0.52(3)     | 0.0204                 | 1          |
| BLaZT    | 1a               | Ba/La | 0.5 | 0.5 | 0.5251(7)   | 0.0207(16)             | 0.95/0.034 |
|          | 1b               | Ti/Zr | 0   | 0   | -0.007(3)   | 0.021(2)               | 0.99/0.01  |
|          | 1c               | O1    | 0.5 | 0   | 0.096(4)    | 0.006(3)               | 1          |
|          | 1d               | O2    | 0   | 0   | 0.516(19)   | 0.006(3)               | 1          |

Table S3. Selected bond distances (Å) for BZT, BSmZT and BLaZT powder from X-ray diffraction data.

| Bond distances (Å)       | BZT         | BSmZT      | BLaZT      |
|--------------------------|-------------|------------|------------|
| 4(Ti/Zr-O <sub>1</sub> ) | 2.0054 (17) | 2.032 (4)  | 2.024(3)   |
| 1(Ti/Zr-O <sub>2</sub> ) | 2.20 (3)    | 2.09 (13)  | 2.06(9)    |
| 1(Ti/Zr-O <sub>2</sub> ) | 1.83 (3)    | 1.91 (13)  | 1.95(9)    |
| 4(Ba/Ln-O <sub>1</sub> ) | 2.780 (14)  | 2.594 (12) | 2.627(10)  |
| 4(Ba/Ln-O <sub>1</sub> ) | 2.899 (15)  | 3.064 (14) | 3.032(11)  |
| 4(Ba/Ln-O <sub>2</sub> ) | 2.8285 (11) | 2.8116 (5) | 2.8119(14) |

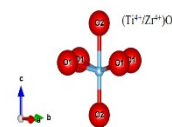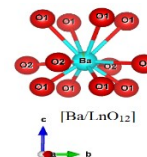

Table S4. Equivalent circuit electrical parameters obtained from a complex impedance spectrum for BZT, BSmZT and BLaZT ceramics.

| Composition | T(°C)   | $R_{gb}(k\Omega)$ | $C_{gb}(nF)$ | $CPE_{gb}$<br>( $nF.s^{\alpha-1}$ ) | $\alpha_{gb}$ | $R_g(k\Omega)$ | $C_g(nF)$ | $CPE_g$<br>( $nF.s^{\alpha-1}$ ) | $\alpha_g$ |
|-------------|---------|-------------------|--------------|-------------------------------------|---------------|----------------|-----------|----------------------------------|------------|
| BZT         | 300     | 659.786           | 1.100        | 9.11                                | 0.7271        | 12.083         | 0.5938    | 53.2000                          | 0.4967     |
|             | 310     | 489.401           | 1.054        | 9.652                               | 0.7314        | 09.770         | 0.5706    | 18.3100                          | 0.5838     |
|             | 320     | 339.272           | 0.905        | 9.623                               | 0.7534        | 07.374         | 0.5574    | 5.9950                           | 0.6725     |
|             | 330     | 258.826           | 0.908        | 10.33                               | 0.7504        | 05.842         | 0.5372    | 5.0750                           | 0.6312     |
|             | 340     | 186.763           | 0.814        | 11.26                               | 0.7542        | 04.683         | 0.5189    | 4.3880                           | 0.7149     |
|             | 350     | 144.011           | 0.5869       | 10.95                               | 0.7773        | 03.685         | 0.5208    | 0.6398                           | 0.8682     |
|             | 360     | 108.708           | 0.605        | 12.41                               | 0.7658        | 03.014         | 0.3960    | 0.8895                           | 0.9016     |
|             | 370     | 083.813           | 0.5698       | 13.85                               | 0.7591        | 02.466         | 0.3355    | 1.2370                           | 0.900      |
|             | 380     | 063.399           | 0.4953       | 15.28                               | 0.7564        | 01.963         | 0.3653    | 1.5210                           | 0.9393     |
|             | 390     | 050.915           | 0.2113       | 16.88                               | 0.7627        | 01.642         | 0.8769    | 1.5430                           | 0.9367     |
| BSmZT       | 400     | 038.333           | 0.1261       | 18.54                               | 0.7596        | 01.383         | 0.1124    | 1.6310                           | 0.9786     |
|             | 300     | 719.779           | 0.6889       | 6.706                               | 0.7212        | 14.225         | 0.9456    | 0.8148                           | 0.9398     |
|             | 310     | 538.326           | 0.6014       | 6.401                               | 0.7444        | 11.529         | 1.3390    | 1.0900                           | 0.9401     |
|             | 320     | 422.629           | 0.6713       | 6.926                               | 0.7300        | 09.375         | 1.5110    | 1.1983                           | 0.9413     |
|             | 330     | 337.523           | 0.6598       | 7.093                               | 0.7306        | 07.767         | 1.7125    | 1.5190                           | 0.9766     |
|             | 340     | 290.585           | 0.5445       | 7.421                               | 0.7404        | 06.368         | 1.2350    | 0.7101                           | 0.9686     |
|             | 350     | 237.338           | 0.6696       | 13.51                               | 0.6557        | 05.385         | 0.1686    | 1.6310                           | 0.9574     |
|             | 360     | 198.575           | 0.7076       | 26.58                               | 0.5748        | 04.532         | 0.3340    | 2.0110                           | 0.9512     |
|             | 370     | 173.496           | 0.6992       | 41.99                               | 0.5278        | 03.846         | 0.5527    | 2.3960                           | 0.8819     |
|             | 380     | 146.834           | 0.6322       | 50.04                               | 0.5207        | 03.230         | 0.9110    | 32.0200                          | 0.6417     |
| BLaZT       | 390     | 129.603           | 0.5621       | 51.84                               | 0.5229        | 02.682         | 1.1500    | 39.1200                          | 0.6353     |
|             | 400     | 110.810           | 0.4991       | 53.73                               | 0.5258        | 02.230         | 1.5000    | 44.8700                          | 0.6288     |
|             | 300     | 1333              | 0.6416       | 8.276                               | 0.6561        | 24.989         | 0.5856    | 3.282                            | 0.7073     |
|             | 310     | 1036              | 0.5667       | 8.302                               | 0.6718        | 19.590         | 0.5651    | 0.4827                           | 0.8935     |
|             | 320     | 819.011           | 0.5285       | 8.503                               | 0.6788        | 15.888         | 0.2331    | 0.5954                           | 0.9803     |
|             | 330     | 667.223           | 0.4658       | 8.662                               | 0.6894        | 13.195         | 0.5155    | 0.2561                           | 0.987      |
|             | 340     | 569.339           | 0.4506       | 9.371                               | 0.6837        | 10.888         | 0.5951    | 0.1687                           | 0.9922     |
|             | 350     | 476.143           | 0.4406       | 10.77                               | 0.6712        | 08.643         | 0.6330    | 0.1067                           | 0.9999     |
|             | 360     | 410.313           | 0.4343       | 12.67                               | 0.6551        | 06.866         | 0.7427    | 0.1461                           | 0.8944     |
|             | 370     | 358.419           | 0.4309       | 14.82                               | 0.6399        | 05.690         | 0.7402    | 0.2402                           | 0.7772     |
| 380         | 304.330 | 0.4262            | 16.57        | 0.6301                              | 04.589        | 0.7152         | 0.3800    | 0.4531                           |            |
| 390         | 263.907 | 0.4381            | 21.34        | 0.6036                              | 03.751        | 0.6803         | 0.1930    | 0.5507                           |            |
| 400         | 221.422 | 0.4257            | 20.82        | 0.6067                              | 03.151        | 0.6821         | 0.4126    | 0.4647                           |            |

Table S5. Parameters obtained from plot for BZT, BSmZT and BLaZT ceramics.

| Composition | T(°C) | $\sigma_{dc}(\Omega.m)^{-1}$ | $A_1 (\Omega^{-1} m^{-1} rad^{-s})$ | $n_1$   | $A_2(\Omega^{-1} m^{-1} rad^{-s})$ | $n_2$   |
|-------------|-------|------------------------------|-------------------------------------|---------|------------------------------------|---------|
| BZT         | 300   | $2.11827 \cdot 10^{-5}$      | $2.38222 \cdot 10^{-4}$             | 0.10936 | $2.41525 \cdot 10^{-9}$            | 0.89043 |
|             | 320   | $3.9889810^{-5}$             | $3.51436 \cdot 10^{-5}$             | 0.29756 | $1.00449 \cdot 10^{-8}$            | 0.80088 |
|             | 340   | $7.1533 \cdot 10^{-5}$       | $4.63637 \cdot 10^{-5}$             | 0.29856 | $4.62008 \cdot 10^{-8}$            | 0.70671 |
|             | 360   | $1.2139710^{-4}$             | $7.65681 \cdot 10^{-6}$             | 0.51168 | $1.2957 \cdot 10^{-6}$             | 0.50165 |
|             | 380   | $2.06372 \cdot 10^{-4}$      | $3.000171 \cdot 10^{-6}$            | 0.63875 | $9.1723 \cdot 10^{-5}$             | 0.2551  |
|             | 400   | $3.4104310^{-4}$             | $5.79406 \cdot 10^{-7}$             | 0.83669 | $4.692 \cdot 10^{-4}$              | 0.01691 |
| BSmZT       | 300   | $1.4929910^{-5}$             | $1.16326E-7$                        | 0.63998 | $4.14008 \cdot 10^{-6}$            | 0.32183 |
|             | 320   | $2.5325110^{-5}$             | $2.16823 \cdot 10^{-8}$             | 0.81456 | $1.79789 \cdot 10^{-5}$            | 0.25405 |
|             | 340   | $3.66786 \cdot 10^{-5}$      | $9.99681 \cdot 10^{-9}$             | 0.88976 | $6.41151 \cdot 10^{-5}$            | 0.19676 |
|             | 360   | $4.41447 \cdot 10^{-5}$      | $6.3933 \cdot 10^{-9}$              | 0.90021 | $1.59699 \cdot 10^{-4}$            | 0.15974 |
|             | 380   | $4.72069 \cdot 10^{-5}$      | $3.999 \cdot 10^{-9}$               | 0.94781 | $2.57557 \cdot 10^{-4}$            | 0.14335 |
|             | 400   | $4.9064 \cdot 10^{-5}$       | $3.60856 \cdot 10^{-9}$             | 0.96738 | $3.45475 \cdot 10^{-4}$            | 0.13063 |
| BLaZT       | 300   | $1.2433510^{-5}$             | $2.47142 \cdot 10^{-9}$             | 0.59858 | $3.4077 \cdot 10^{-5}$             | 0.34585 |
|             | 320   | $2.19264 \cdot 10^{-5}$      | $8.03615 \cdot 10^{-9}$             | 0.71897 | $4.1397 \cdot 10^{-5}$             | 0.11809 |
|             | 340   | $3.66786 \cdot 10^{-5}$      | $2.66647 \cdot 10^{-9}$             | 0.82855 | $6.02951 \cdot 10^{-5}$            | 0.09254 |
|             | 360   | $4.416410^{-5}$              | $1.40432 \cdot 10^{-9}$             | 0.88744 | $7.71349 \cdot 10^{-5}$            | 0.08554 |
|             | 380   | $5.84267 \cdot 10^{-5}$      | $1.04544 \cdot 10^{-9}$             | 0.90915 | $9.07504 \cdot 10^{-5}$            | 0.08309 |
|             | 400   | $7.9373410^{-5}$             | $9.4895310^{-10}$                   | 0.91514 | $1.07504 \cdot 10^{-5}$            | 0.07097 |

Table S6.Parameters obtained from plot for BZT, BLaZT and BSmZT ceramics.

| Composition | T(°C) | $M_{max}^{gb}$ | $f_{max}^{gb}$ | $\beta_{gb}$ | $M_{max}^g$ | $f_{max}^g$  | $\beta_g$ |
|-------------|-------|----------------|----------------|--------------|-------------|--------------|-----------|
| BZT         | 300   | 0.43905        | 264.63743      | 0.47856      | 3.43004     | 25507.72669  | 0.89575   |
|             | 310   | 0.4407         | 355.38291      | 0.46143      | 3.33417     | 31507.58249  | 0.87862   |
|             | 320   | 0.43717        | 520.37911      | 0.44147      | 3.24325     | 41195.19434  | 0.86489   |
|             | 330   | 0.43271        | 695.19616      | 0.42825      | 3.16443     | 49964.37188  | 0.85481   |
|             | 340   | 0.42066        | 1000.11272     | 0.41497      | 3.03124     | 62856.08699  | 0.84461   |
|             | 350   | 0.41514        | 1327.58268     | 0.39424      | 2.91035     | 75218.54733  | 0.82376   |
|             | 360   | 0.43377        | 1828.61887     | 0.39610      | 2.73445     | 91910.67632  | 0.78043   |
|             | 370   | 0.45956        | 2424.26831     | 0.40289      | 2.49964     | 112131.65118 | 0.72097   |
|             | 380   | 0.47949        | 3608.87109     | 0.38248      | 2.25119     | 140970.77156 | 0.66964   |
|             | 390   | 0.50292        | 5397.59779     | 0.35713      | 2.02868     | 183782.59316 | 0.62305   |
|             | 400   | 0.52939        | 10550.05084    | 0.29794      | 1.72061     | 302246.45614 | 0.57425   |
| BSmZT       | 300   | 1.42958        | 306.57564      | 0.58889      | 2.47676     | 9219.36089   | 0.74511   |
|             | 310   | 1.38766        | 395.70674      | 0.58539      | 2.39642     | 12452.60271  | 0.72007   |
|             | 320   | 1.36185        | 487.18009      | 0.58923      | 2.35801     | 16006.98902  | 0.70552   |
|             | 330   | 1.34548        | 610.70714      | 0.58542      | 2.31876     | 20271.70059  | 0.69527   |
|             | 340   | 1.33977        | 755.72604      | 0.56956      | 2.26626     | 24339.39729  | 0.69173   |
|             | 350   | 1.34544        | 998.5457       | 0.53772      | 2.18073     | 30041.73775  | 0.69066   |
|             | 360   | 1.36644        | 1268.76576     | 0.50313      | 2.07388     | 35503.82654  | 0.69858   |
|             | 370   | 1.39957        | 1586.09663     | 0.47426      | 1.96733     | 40918.16552  | 0.71152   |
|             | 380   | 1.43806        | 2007.10734     | 0.45154      | 1.86074     | 47054.3747   | 0.72991   |
|             | 390   | 1.50876        | 2174.47012     | 0.44659      | 1.67031     | 45281.61518  | 0.71422   |
|             | 400   | 1.51779        | 2611.97553     | 0.43967      | 1.60641     | 49941.45751  | 0.72326   |
| BLaZT       | 300   | 0.89129        | 225.30536      | 0.50994      | 2.72621     | 8311.79714   | 0.78624   |
|             | 310   | 0.91039        | 302.64429      | 0.52703      | 2.79416     | 10755.90801  | 0.80038   |
|             | 320   | 0.93654        | 398.35198      | 0.54410      | 2.83893     | 13667.07317  | 0.80824   |
|             | 330   | 0.95035        | 495.3434       | 0.53382      | 2.75176     | 17350.0067   | 0.79252   |
|             | 340   | 0.96793        | 603.90378      | 0.52101      | 2.68314     | 21511.99619  | 0.78192   |
|             | 350   | 0.98671        | 764.51363      | 0.50640      | 2.61981     | 27281.81677  | 0.77643   |
|             | 360   | 1.00431        | 963.76800      | 0.48773      | 2.58010     | 34249.84634  | 0.78144   |
|             | 370   | 1.01808        | 1198.44674     | 0.47078      | 2.56509     | 42018.02714  | 0.79364   |
|             | 380   | 1.03519        | 1515.34752     | 0.45554      | 2.57604     | 51790.73531  | 0.81295   |
|             | 390   | 1.04961        | 1888.96968     | 0.44100      | 2.60892     | 62550.38401  | 0.83791   |
|             | 400   | 1.06092        | 2330.37117     | 0.43051      | 2.63668     | 74327.73236  | 0.86520   |
